# Supplementary material for: Fish connectivity mapping: linking chemical stressors by their mechanisms of action-driven transcriptomic profiles
Source: PubMed Central journal article supplement (PMC4730593; doi:10.1186/s12864-016-2406-y), 2016-01-28
Supplement: 12864_2016_2406_MOESM5_ESM.pdf [file 12864_2016_2406_MOESM5_ESM.pdf]

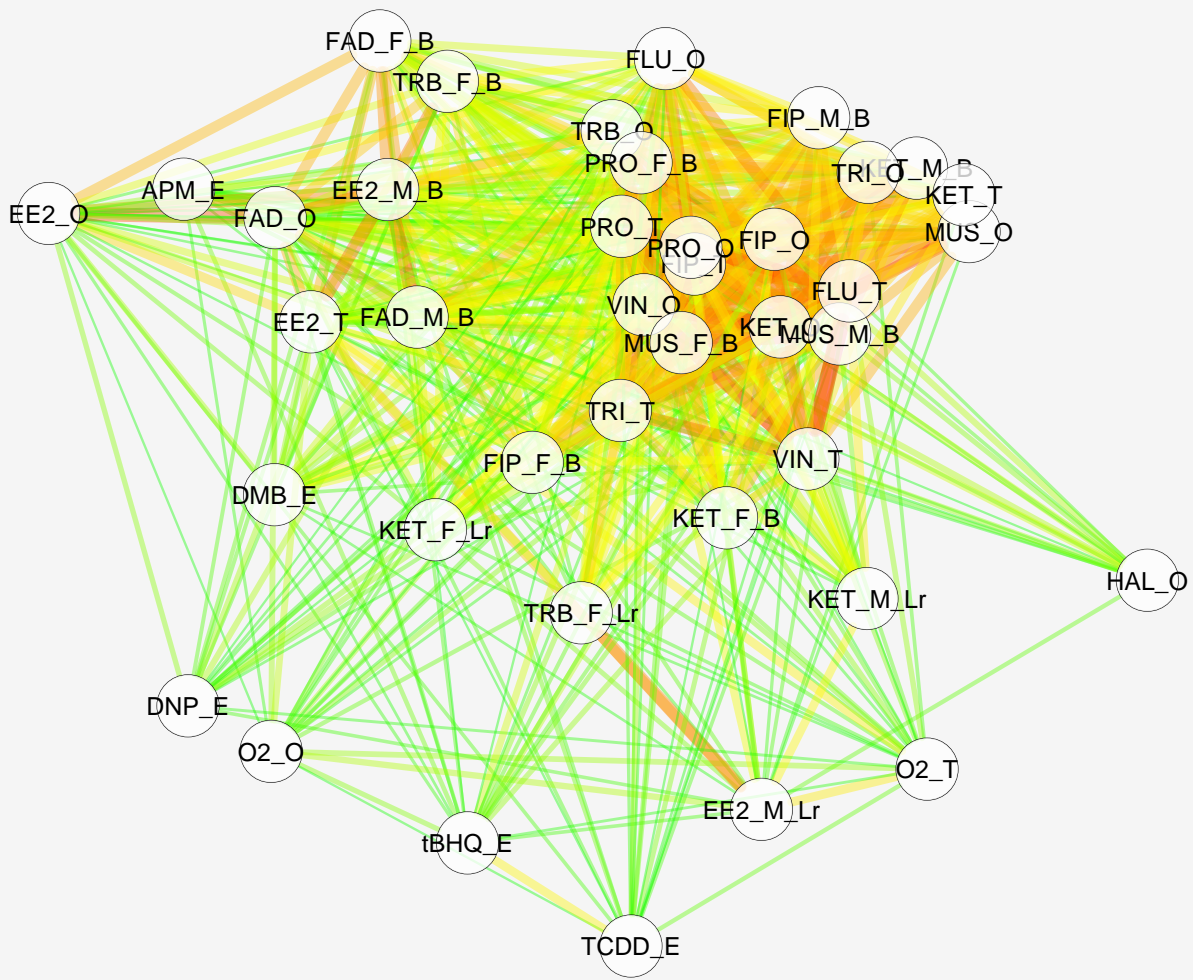

A

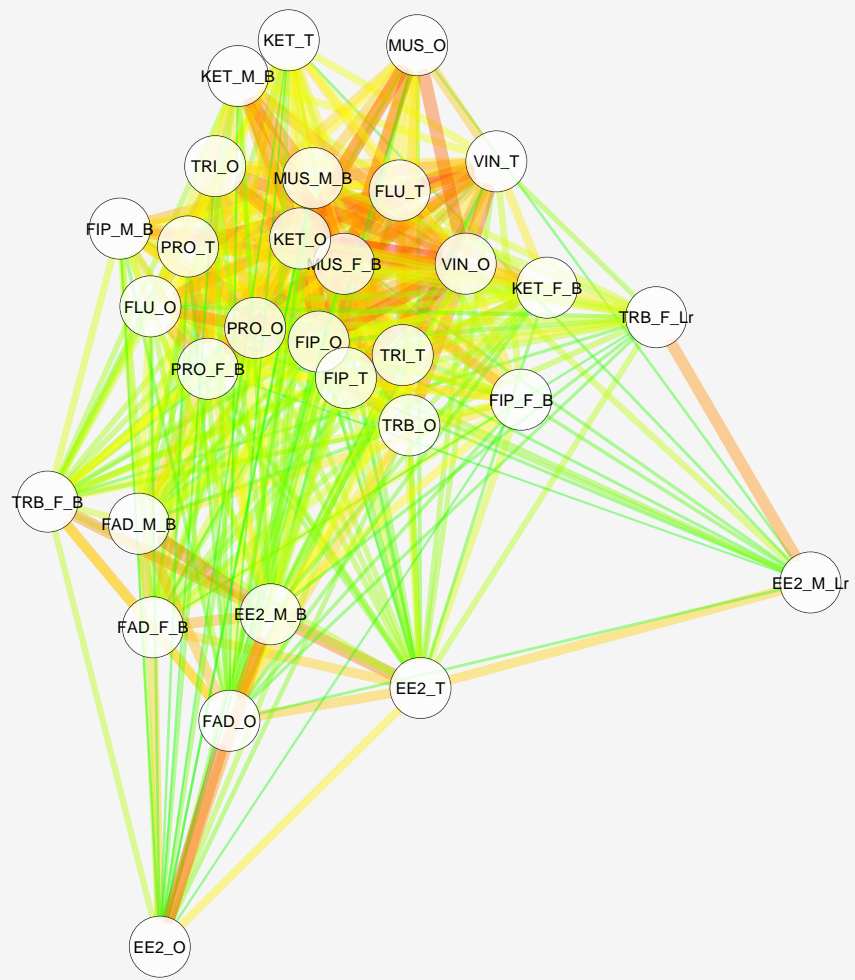

B
